# Supplementary material for: Structure and luminescence properties of Dy3+ doped quaternary tungstate Li3Ba2Gd3(WO4)8 for application in wLEDs
Source: Royal Society of Chemistry journal article supplement (doi:10.1039/d3ra02501b), 2023-01-01
Supplement: d3ra02501b1.pdf [file d3ra02501b1.pdf]

## Supporting Information for

### Structure and luminescence properties of Dy<sup>3+</sup> doped quaternary tungstate Li<sub>3</sub>Ba<sub>2</sub>Gd<sub>3</sub>(WO<sub>4</sub>)<sub>8</sub> for applications in wLEDs

Abir Douzi<sup>a,b</sup>, Sami Slimi<sup>a</sup>, Eduard Madirov<sup>c</sup>, Andrey Turshatov<sup>c</sup>, Bryce S. Richards<sup>c</sup>, Rosa Maria Solé<sup>a</sup>, Magdalena Aguiló<sup>a</sup>, Francesc Díaz<sup>a</sup>, Ezzedine Ben Salem<sup>b</sup>, Xavier Mateos<sup>a,d,\*</sup>

<sup>a</sup>Universitat Rovira i Virgili (URV), Física i Cristal·lografia de Materials (FiCMA), Marcel·li Domingo 1, 43007, Tarragona, Spain.

<sup>b</sup>I.P.E.I. of Monastir, Unit of Materials and Organic Synthesis, University of Monastir 5019, UR17ES31, Tunisia

<sup>c</sup>Institute of Microstructure Technology, Karlsruhe Institute of Technology, Hermann-von-Helmholtz-Platz 1, 76344 Eggenstein-Leopoldshafen, Germany.

<sup>d</sup>Serra Hünter Fellow.

\*Corresponding author, e-mail: [xavier.mateos@urv.cat](mailto:xavier.mateos@urv.cat)

#### 1-DTA analysis:

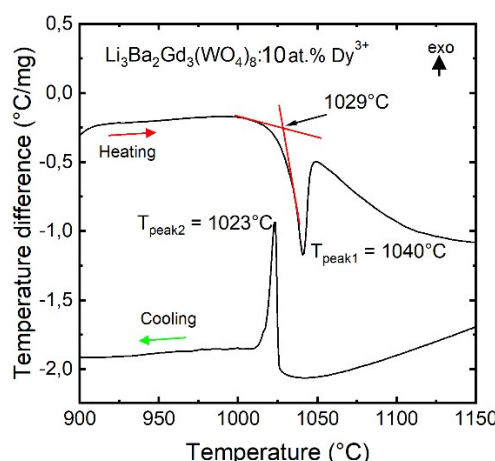

**Fig.S1.** Differential thermal analysis (DTA) curves for Li<sub>3</sub>Ba<sub>2</sub>Gd<sub>3</sub>(WO<sub>4</sub>)<sub>8</sub>:10 at.% Dy<sup>3+</sup>

#### 2-RAMAN and FTIR spectroscopy:

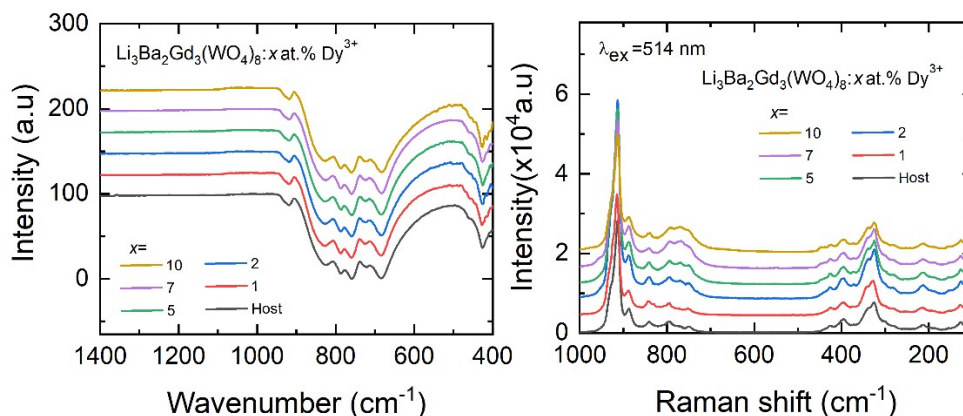

**Fig.S2.** (a) FTIR spectra (b) Raman spectra of Li<sub>3</sub>Ba<sub>2</sub>Gd<sub>3</sub>(WO<sub>4</sub>)<sub>8</sub> doped at different concentration levels of Dy<sup>3+</sup> ions

### 3- Bandgap and electronic structure:

The Kubelka-Munk (K-M) relation is employed to evaluate the optical band gap values of the fabricated powder <sup>39</sup>:

$$F(R_{\infty}) = \frac{(1 - R_{\infty})^2}{2R_{\infty}} = K/S \quad , \quad (\text{Eq.S1})$$

where  $R_{\infty} = R_{\text{sample}}/R_{\text{standard}}$  ; K is the absorption coefficient and S is the scattering coefficient. On the other hand, the band gap  $E_g$  of the material and the linear absorption coefficient  $\alpha$  of the material are correlated by the Tauc equation:

$$ah\nu = C1 \times (h\nu - E_g)^{1/2} \quad , \quad (\text{Eq.S2})$$

whereby,  $h\nu$  is the energy of the photon and C1 represents the proportionality constant. In the case where, the photons scatter from the surface of the material in a perfectly diffuse manner, then the value of the absorption coefficient K becomes almost equal to  $2\alpha$ . Assuming that S is constant with respect to the wavelength  $\lambda$ , the relationship between  $F(R_{\infty})$  and  $E_g$  can be obtained using equations (2) and (3), as follows:

$$[F(R_{\infty})h\nu]^2 = C2 \times (h\nu - E_g) \quad , \quad (\text{Eq.S3})$$

### 3- Calculation of the chromaticity coordinates:

In the case of the CIE 1931-XYZ tri-chromatic system, the tri-stimulus values are defined as follow:

$$X = \int \bar{x}(\lambda)I(\lambda)d\lambda \quad , \quad (\text{Eq.S4})$$

$$Y = \int \bar{y}(\lambda)I(\lambda)d\lambda \quad , \quad (\text{Eq.S5})$$

$$Z = \int \bar{z}(\lambda)I(\lambda)d\lambda \quad , \quad (\text{Eq.S6})$$

where  $\bar{x}(\lambda)$ ,  $\bar{y}(\lambda)$ ,  $\bar{z}(\lambda)$  are the observer's colour functions defined by the CIE  $I(\lambda)$  and  $I(\lambda)$  is the spectral intensity of the material. The chromaticity coordinates are determined as follows:

$$x = \frac{X}{X + Y + Z} \quad , \quad (\text{Eq.S7})$$

$$y = \frac{Y}{X + Y + Z} \quad , \quad (\text{Eq.S8})$$

$$z = \frac{Z}{X + Y + Z} \quad , \quad (\text{Eq.S9})$$

where  $x + y + z = 1$  , so it is sufficient to define chromaticity with two numbers, usually x and y.
